# Supplementary material for: The Coral of Life
Source: Springer Nature journal article supplement (doi:10.1007/s11692-019-09474-w), 2019-04-30
Supplement: 11692_2019_9474_MOESM3_ESM.pdf [file 11692_2019_9474_MOESM3_ESM.pdf]

**The Coral of Life.** Published in: **Evolutionary Biology.** Author: J. Podani, Department of Plant Systematics, Ecology and Theoretical Biology, Institute of Biology, Eötvös University, Budapest, Hungary. E-mail: podani@ludens.elte.hu

**Supplementary Table S1.** Highly cited relevant papers containing the expression “Tree of life” in the abstract (topic) and/or the title, according to the WoS statistics.

| Rank<br>(for<br>topic) | Rank<br>(for<br>title) | Number of<br>citations<br>(January<br>2019) | Author(s) and title                                                                                                                                     | Source                                                              |
|------------------------|------------------------|---------------------------------------------|---------------------------------------------------------------------------------------------------------------------------------------------------------|---------------------------------------------------------------------|
| 1                      | 1                      | 2403                                        | <i>STRING v10: protein-protein interaction networks, integrated over the tree of life.</i> By: Szklarczyk, Damian et al.                                | NUCLEIC ACIDS RESEARCH 43: D1 D447-D452. 2015                       |
| 2                      |                        | 2123                                        | <i>Prospects for inferring very large phylogenies by using the neighbor-joining method</i> By: Tamura, K; Nei, M; Kumar, S                              | PNAS 101: 11030-11035 2004                                          |
| 3                      | 2                      | 1336                                        | <i>The amphibian tree of life.</i> By: Frost, DR et al.                                                                                                 | BULLETIN OF THE AMERICAN MUSEUM OF NATURAL HISTORY 297: 8-370. 2006 |
| 4                      | 3                      | 1222                                        | <i>Broad phylogenomic sampling improves resolution of the animal tree of life.</i> By: Dunn, Casey W. et al.                                            | NATURE 452: 745-U5. 2008                                            |
| 5                      | 4                      | 1044                                        | <i>Interactive Tree Of Life (iTOL): an online tool for phylogenetic tree display and annotation.</i> By: Letunic, Ivica; Bork, Peer                     | BIOINFORMATICS 23: 127-128 2007                                     |
| 6                      |                        | 1039                                        | <i>Phylogenetic classification and the universal tree.</i> By: Doolittle, WF                                                                            | SCIENCE 284: 2124-2128. 1999                                        |
| 7-8                    |                        | 945                                         | <i>Genome-scale approaches to resolving incongruence in molecular phylogenies.</i> By: Rokas, A. et al.                                                 | NATURE 425: 798-804. 2003                                           |
| 7-8                    |                        | 945                                         | <i>The global diversity of birds in space and time.</i> By: Jetz, W. et al.                                                                             | NATURE 491: 444-448. 2012                                           |
| 9                      | 5                      | 900                                         | <i>Toward automatic reconstruction of a highly resolved tree of life.</i> By: Ciccarelli, FD et al.                                                     | SCIENCE 311: 1283-1287. 2006                                        |
| 10                     |                        | 889                                         | <i>Unravelling angiosperm genome evolution by phylogenetic analysis of chromosomal duplication events.</i> By: Bowers, JE. et al.                       | NATURE 422: 433-438. 2003                                           |
|                        | 6                      | 824                                         | <i>Interactive Tree Of Life v2: online annotation and display of phylogenetic trees made easy.</i> By: Letunic, Ivica; Bork, Peer                       | NUCLEIC ACIDS RESEARCH 39 Supplement 2: W475-W478. 2011             |
|                        | 7                      | 818                                         | <i>Interactive tree of life (iTOL) v3: an online tool for the display and annotation of phylogenetic and other trees</i> By: Letunic, Ivica; Bork, Peer | NUCLEIC ACIDS RESEARCH 44: W242-W245 2016                           |
|                        | 8                      | 658                                         | <i>Phylogenomics and the reconstruction of the tree of life.</i> By: Delsuc, F; Brinkmann, H; Philippe, H                                               | NATURE REVIEWS GENETICS 6: 361-375. 2005                            |
|                        | 9                      | 562                                         | <i>Paleontological evidence to date the tree of life.</i> By: Benton, Michael J.; Donoghue, Philip C. J.                                                | MOLECULAR BIOLOGY AND EVOLUTION 24: 26-53. 2007                     |
|                        | 10                     | 553                                         | <i>Whole-genome analyses resolve early branches in the tree of life of modern birds.</i> By: Jarvis, Erich D. et al.                                    | SCIENCE 346: 1320-1331. 2014                                        |
