# Supplementary material for: The Coral of Life
Source: Springer Nature journal article supplement (doi:10.1007/s11692-019-09474-w), 2019-04-30
Supplement: 11692_2019_9474_MOESM4_ESM.pdf [file 11692_2019_9474_MOESM4_ESM.pdf]

**The Coral of Life.** Published in: **Evolutionary Biology.** Author: J. Podani, Department of Plant Systematics, Ecology and Theoretical Biology, Institute of Biology, Eötvös University, Budapest, Hungary. E-mail: podani@ludens.elte.hu

**Supplementary Table S2.** Some important features of published ToL diagrams, to illustrate diversity of underlying ideas and concepts. Except for Haeckel’s “Stammbaum” (first row) and Whittaker’s five-kingdom proposal (second row), which are often referred to as ToLs by other authors, the conditions for inclusion in the table were that: 1) the authors considered them explicitly as ToL, and 2) the diagram covered the entire cellular life known at that time, at least at the level of major domains. P-prokaryote, E-eukaryote, N/A-Not Applicable criterion.

| Reference           | Icon – illustrating overall shape                                                   | Graph theoretical tree (Yes/No) | Timescale None/linear/logarithmic | Evolutionary distance None/molecular | P/E ratio of node taxa | Evolutionary events or other info super-imposed | Underlying classification shown             | Taxonomic status of nodes or branches   | Divergence vs ancestry | Extinct groups (Yes/No) | Diagram type after Podani (2013, 2017) |
|---------------------|-------------------------------------------------------------------------------------|---------------------------------|-----------------------------------|--------------------------------------|------------------------|-------------------------------------------------|---------------------------------------------|-----------------------------------------|------------------------|-------------------------|----------------------------------------|
| Haeckel (1866)      | 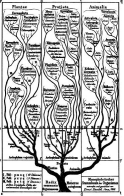   | No                              | None                              | None                                 | N/A                    | None                                            | kingdoms, other Linnaean ranks              | N/A                                     | Div.                   | No                      | Synchronous oak                        |
| Whittaker (1969)    |   | No                              | None                              | None                                 | N/A                    | Nutrition modes added, embedded phylogenies     | 5 kingdoms, many smaller groups inside each | N/A                                     | Anc. for 5 groups      | No                      | Cactus                                 |
| Woese et al. (1990) |  | Yes - rooted                    | None                              | Molecular                            | 13/6                   | None                                            | 3 domains                                   | Linnaean taxa at various ranks          | Div.                   | No                      | Synchronous tree                       |
| Pace (1997)         |  | Yes - rooted                    | None                              | Molecular                            | 48/19                  | None                                            | 3 domains                                   | Genera plus organelles, numbered traits | Div.                   | No                      | Synchronous tree                       |

| Reference                                               | Icon – illustrating overall shape                                                                   | Graph theoretical tree (Yes/No) | Timescale None/linear/logarithmic      | Evolutionary distance None/molecular | P/E ratio of node taxa | Evolutionary events or other info super-imposed | Underlying classification shown            | Taxonomic status of nodes or branches | Divergence vs ancestry | Extinct groups (Yes/No) | Diagram type after Podani (2013, 2017) |
|---------------------------------------------------------|-----------------------------------------------------------------------------------------------------|---------------------------------|----------------------------------------|--------------------------------------|------------------------|-------------------------------------------------|--------------------------------------------|---------------------------------------|------------------------|-------------------------|----------------------------------------|
| Doolittle (1999)                                        | Consensus ToL<br>  | No                              | None                                   | None                                 | N/A                    | LUCA, 2 types of endo-symbiosis                 | 3 domains and some clades within each      | N/A                                   | Both                   | No                      | Coral                                  |
|                                                         | Revised „tree”<br> |                                 |                                        |                                      |                        |                                                 |                                            |                                       |                        |                         | Anastomosing (fan) coral               |
| Gribaldo & Philippe (2002)                              |                    | Yes - rooted                    | None                                   | None                                 | 15/10                  | None                                            | 3 domains                                  | Various clades                        | Div.                   | No                      | Synchronous tree                       |
| Baldauf et al. (2004)                                   |                    | Yes - rooted                    | None                                   | None                                 | 41/39                  | None                                            | 3 domains, major clades                    | various ranks from genera and up      | Div.                   | No                      | Synchronous tree                       |
| Gogarten and Townsend (2005)                            |                    | No                              | None                                   | None                                 | 8/1                    | Some uncertainties shown                        | 3 domains, some prokaryotic groups         | Various groups                        | Both                   | No                      | Anastomosing coral                     |
| Delsuc et al. (2005)                                    |                   | Yes - unrooted                  | None                                   | None                                 | 19/19                  | 2 endo-symbioses                                | Nested cladistic: 3 – 8 - 38               | Various clades                        | Div.                   | No                      | Synchronous tree                       |
| Benton (2005)                                           |                  | No                              | None                                   | None                                 | 4/5                    | None                                            | 9 groups named, incl. mitoch. and plastids | Mostly unnamed terminals              | Div.                   | No                      | Coral                                  |
| Cracraft et al. in Eldredge (2005)                      |                  | Yes - rooted                    | None                                   | None                                 | 16/126                 | None                                            | Cladistic, few large clades named          | Various, mostly Linnaean taxa         | Div.                   | No                      | Synchronous tree                       |
| Stearns and Hoekstra (2005, p. 419) after Offner (2001) |                  | Yes - rooted                    | None, Dates mentioned are not to scale | None                                 | 12/13                  | Six major events noted                          | 3 domains, total of 25 subgroups           | Clades                                | Div.                   | No                      | Synchronous tree                       |

| Reference                               | Icon – illustrating overall shape                                                            | Graph theoretical tree (Yes/No)     | Timescale None/linear/logarithmic | Evolutionary distance None/molecular | P/E ratio of node taxa | Evolutionary events or other info super-imposed | Underlying classification shown | Taxonomic status of nodes or branches | Divergence vs ancestry | Extinct groups (Yes/No) | Diagram type after Podani (2013, 2017) |
|-----------------------------------------|----------------------------------------------------------------------------------------------|-------------------------------------|-----------------------------------|--------------------------------------|------------------------|-------------------------------------------------|---------------------------------|---------------------------------------|------------------------|-------------------------|----------------------------------------|
| Ciccarelli et al. (2006)                | 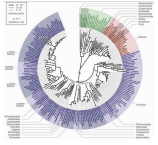            | Yes - unrooted                      | None                              | Molecular                            | 168/23                 | None                                            | 30 major clades                 | Species                               | Div.                   | No                      | Synchronous tree                       |
| Cavalier-Smith (2006)                   |             | Yes - rooted                        | None                              | None                                 | 4/1                    | Cell biology, physiology, ecology, time         | 4 P groups + E                  | Overlapping large groups              | Anc. and 1 div.        | No                      | Achronous tree                         |
| Lecointre and Le Guyader (2006)         | Global      | Yes – unrooted (= basal trichotomy) | None                              | None                                 | 2/1                    | None                                            | None                            | Domains                               | Div.                   | No                      | Synchronous tree                       |
|                                         | Subtrees    | Yes - rooted                        | None                              | None                                 | N/A                    | None                                            | None                            | Various clades/taxa                   | Div.                   | No                      | Synchronous tree                       |
| Tree of Life (Maddison and Schulz 2007) | Global      | yes – unrooted (= basal trichotomy) | None                              | None                                 | 2/1                    | None                                            | None                            | Domains                               | Div.                   | No                      | Synchronous tree                       |
|                                         | Subtrees   | yes - rooted                        | None                              | None                                 | N/A                    | None                                            | None                            | Various clades/taxa                   | Div                    | Yes                     | Asynchronous tree                      |
| Hedges and Kumar (2009)                 | Global    | Yes – rooted                        | Logarithmic                       | None                                 | 102/1508               | One plastid endosymb.                           | 19 major clades                 | Families or “equivalents”             | Div.                   | No                      | Synchronous tree                       |
|                                         | Subtrees  | Yes rooted                          | Linear                            | None                                 | N/A                    | None                                            | Various clades/taxa             | Various clades/taxa                   | Div.                   | No                      | Synchronous tree                       |

| Reference                              | Icon – illustrating overall shape                                                              | Graph theoretical tree (Yes/No) | Timescale None/ linear/ logarithmic | Evolutionary distance None/molecular | P/E ratio of node taxa | Evolutionary events or other info super-imposed         | Underlying classification shown    | Taxonomic status of nodes or branches | Divergence vs ancestry | Extinct groups (Yes/No) | Diagram type after Podani (2013, 2017) |
|----------------------------------------|------------------------------------------------------------------------------------------------|---------------------------------|-------------------------------------|--------------------------------------|------------------------|---------------------------------------------------------|------------------------------------|---------------------------------------|------------------------|-------------------------|----------------------------------------|
| David and Alm (2011)                   | 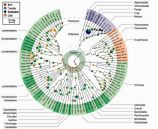              | Yes . rooted                    | Linear                              | None                                 | 90/11                  | 4 types of genetic events                               | 27 major clades                    | Species                               | Div.                   | No                      | Synchronous tree                       |
| Rosindell and Harmon (2012)            |               | No, zoomable                    | None                                | None                                 | N/A                    | Species richness and divergence time at each major node | Nested clades – Linnaean taxa      | Down to species (as leaves)           | Div.                   | Yes                     | Asynchronous oak                       |
| Vargas et Zardoya (2012)               | <br>Cover     | No                              | None                                | None                                 | N/A                    | None                                                    | Nested clades – Linnaean taxa      | Various taxa, 43 named                | Div.                   | No                      | Synchronous oak                        |
|                                        | <br>Subtrees | Yes                             | None, some dates added              | None                                 | N/A                    | None                                                    | Nested clades and/or Linnaean taxa | Various                               | Div.                   | No                      | Synchronous tree                       |
| Hillis et al. (p. 230 in Pietsch 2013) |             | Yes - rooted                    | None                                | None                                 | 53/2950                | None                                                    | Few large groups with common names | Species                               | Div-                   | No                      | Synchronous tree                       |

| Reference                                | Icon – illustrating overall shape                                                                  | Graph theoretical tree (Yes/No) | Timescale None/linear/logarithmic | Evolutionary distance None/molecular | P/E ratio of node taxa | Evolutionary events or other info super-imposed  | Underlying classification shown               | Taxonomic status of nodes or branches                   | Divergence vs ancestry                 | Extinct groups (Yes/No) | Diagram type after Podani (2013, 2017)          |
|------------------------------------------|----------------------------------------------------------------------------------------------------|---------------------------------|-----------------------------------|--------------------------------------|------------------------|--------------------------------------------------|-----------------------------------------------|---------------------------------------------------------|----------------------------------------|-------------------------|-------------------------------------------------|
| Hillis et al. (2014)                     | 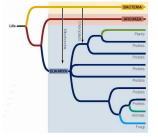                  | Yes - rooted                    | None                              | None                                 | 2/9                    | 2 endo-symbioses, actual and estimated richness  | Few large groups with common names,           | 6 “protists” as terminals, plus 5 others                | Div.                                   | No                      | Synchronous tree                                |
|                                          |                   | Yes - rooted                    | None                              | None                                 | 10/85                  | None                                             | 38 clades named                               | Various clades/taxa                                     | Div.                                   | No                      | Synchronous tree                                |
| Forterre (2015)                          |                   | Yes - rooted                    | None                              | None                                 | 25/10                  | Endosymbioses, major biochem. events, LUCA, LECA | Domains, major groups                         | Various clades                                          | Div. – plus few hypothetical ancestors | No                      | Synchronous tree – hypothetical ancestors added |
| Hedges et al. (2015)                     |                   | Yes, rooted                     | Logarithmic                       | None                                 | 0.3/99.7%              | None                                             | Many large clades at various taxonomic levels | Species                                                 | Div.                                   | No                      | Synchronous tree                                |
| OpenTree of Life (Hinchliff et al. 2015) | <br>Subtrees too | Yes - rooted                    | None                              | None                                 | 59/37                  | None                                             | Cladistic                                     | Uncultured strains, environmental samples, various taxa | Div. Many polytomies                   | No                      | Synchronous tree                                |
| Hug et al. (2016)                        |                 | Yes - unrooted                  | None                              | Molecular                            | 106/5                  | None                                             | Many major prokaryotic clades                 | Strains, genera, some higher taxa                       | Div                                    | No                      | Synchronous tree                                |
| Letunic and Bork (2016)                  |                 | Yes – optional rooting          | None                              | Molecular                            | 175/23                 | None                                             | None                                          | Species                                                 | Div                                    | No                      | Synchronous tree                                |

| Reference                                 | Icon – illustrating overall shape                                                 | Graph theoretical tree (Yes/No) | Timescale None/linear/logarithmic | Evolutionary distance None/molecular | P/E ratio of node taxa | Evolutionary events or other info super-imposed | Underlying classification shown                          | Taxonomic status of nodes or branches | Divergence vs ancestry      | Extinct groups (Yes/No) | Diagram type after Podani (2013, 2017) |
|-------------------------------------------|-----------------------------------------------------------------------------------|---------------------------------|-----------------------------------|--------------------------------------|------------------------|-------------------------------------------------|----------------------------------------------------------|---------------------------------------|-----------------------------|-------------------------|----------------------------------------|
| Scholl and Wiens (2016)                   | 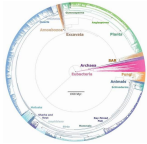 | Yes - unrooted                  | Linear                            | None                                 | 82/2476                | None                                            | 19 large clades named (arbitrary choice, text: Linnaean) | 2558 families                         | Div.                        | No                      | Synchronous tree                       |
| DeVienne (2016)                           |  | Yes – unrooted zoomable         | None                              | None                                 | 2/1                    | Links to info pages included                    | 2 domains, some clades                                   | Clades                                | Div.                        | No                      | Synchronous tree                       |
|                                           |  | Yes - rooted                    | None                              | None                                 | various                | Links to info pages included                    | Cladistics-based with ranks                              | Clades – ranked taxa mixed            | Div – many multi-furcations | Yes – a few             | Asynchronous tree                      |
| Tree of Life Explorer (evogeneao undated) |  | No                              | Logarithmic                       | None                                 | ~1/6                   | Mass extinctions                                | Common names of taxa                                     | Unlabeled                             | Both                        | Yes                     | Coral                                  |

## References

- Baldauf, S.L., D. Bhattacharya, J. Cockrill, P. Hugenholtz, J. Pawlowski, A. G. B. Simpson. 2004. *The Tree of Life: An Overview*. Chapter 4 in *Assembling the Tree of Life* (Eds. J. Cracraft and M. J. Donoghue), Oxford University Press, Oxford.
- Benton, M.J. 2005. *Vertebrate Paleontology*, 3rd ed. Blackwell, Oxford.
- Cavalier-Smith, T. 2006. Cell evolution and Earth history: stasis and revolution. *Phil. Trans. R. Soc. B* 361:969-1006.
- Ciccarelli, F.D., Doerks, T., von Mering, C., Creevey, C.J., Snel, B., Bork, P. 2006. Toward automatic reconstruction of a highly resolved tree of life. *Science* 311(5765):1283-7.
- David, L.A., Alm, E.J. 2011. Rapid evolutionary innovation during an Archaean genetic expansion. *Nature* 469:93–96.
- Delsuc, F., Brinkmann, H., Philippe, H. 2005- Phylogenomics and the reconstruction of the tree of life. *Nat. Rev. Genet.* 6(5):361-75.
- de Vienne, D.M. 2016. Lifemap: exploring the entire tree of life. *PLoS Biol.* 14:e2001624.
- Doolittle, W.F. 1999. Phylogenetic classification and the universal tree. *Science* 284:2124–2128.

- Eldredge, N. 2005. Darwin. Discovering the Tree of Life. W.W. Norton, New York.
- Evogeneao. <https://www.evogeneao.com/>
- Forterre, P. 2015. The universal tree of life: an update. *Front. Microbiol.* 6:717.
- Gogarten, J.P. and J. P. Townsend. 2005. Horizontal gene transfer, genome innovation and evolution. *Nature Reviews - Microbiology* 3: 679-687.
- Gribaldo, S. and Herve' Philippe 2002. Ancient phylogenetic relationships. *Theoretical Population Biology* 61: 391–408 (2002)
- Haeckel, E. 1866. *Generelle Morphologie der Organismen. Zweiter Band: Allgemeine Entwicklungsgeschichte der Organismen.* Berlin: von Georg Reimer.
- Hedges, S. and S. Kumar. 2009. *The Timetree of Life.* Oxford Univ. Press, Oxford.
- Hedges, S.B., J. Marin, M. Suleski, M. Paymer, and S. Kumar. 2015. Tree of Life Reveals Clock-Like Speciation and Diversification *Mol. Biol. Evol.* 2015 Apr; 32(4): 835–845.
- Hillis, D.M., D. Sadava, R. W. Hill, M. V. Price 2014. *Principles of Life, Second Edition.* Sinauer Associates, Sunderland-
- Hinchliff, C.E. et al. 2015. Synthesis of phylogeny and taxonomy into a comprehensive tree of life. *Proceedings of the National Academy of Sciences* 112(41): (2015): 12764-12769
- Hug, L. A. et al. 2016. A new view of the tree of life. *Nature Microbiology* 1, Article number: 16048
- Lecointre, G. and H. Le Guyader. 2007. *The Tree of Life: A Phylogenetic Classification.* Translated by Karen McCoy. Cambridge, MA: Belknap.
- Letunic, I. & Bork, P. 2016. Interactive tree of life (iTOL) v3: an online tool for the display and annotation of phylogenetic and other trees. *Nucleic Acids Res.* 44(W1):W242-5.
- Maddison, D. R. and K.-S. Schulz (eds.) 2007. *The Tree of Life Web Project.* Internet address: <http://tolweb.org>
- Offner, S. 2001. A universal phylogenetic tree. *The American Biology Teacher* 63:164-171
- Pace, N.R. 1997. A molecular view of diversity and the biosphere. *Science* 276: 734-740.
- Pietsch, T.W. 2012. *Trees of life.* Baltimore: John Hopkins University Press.
- Rosindell, J., Harmon, L.J. 2012. OneZoom: A Fractal Explorer for the Tree of Life. *PLoS Biol* 10(10): e1001406.
- Scholl, J.P. & Wiens, JJ. 2016. Diversification rates and species richness across the Tree of Life. *Proc. R. Soc. B* 283: 20161334.

Stearns, S.C. and R.F. Hoekstra. 2005. *Evolution: An Introduction*. Oxford University Press, Oxford.

Vargas, P. y Rafael Zardoya (eds.), 2012. *El Árbol de la vida: sistemática y evolución de los seres vivos*. Madrid.

Whittaker, R.H. 1969. New concepts of kingdoms of organisms. *Science* 163:150-160.

Woese, C.R., O. Kandler and M.L. Wheelis. 1990. Towards a natural system of organisms: Proposal for the domains Archaea, Bacteria, and Eucarya. *Proc. Natl. Acad. Sci. USA* 87: 4576-4579.
